# Supplementary material for: Large-scale implementation of standardized quantitative real-time PCR fecal source identification procedures in the Tillamook Bay Watershed
Source: PLOS journal article supplement (doi:10.1371/journal.pone.0216827), 2019-06-06
Supplement: S4 (10.1371/journal.pone.0216827.s004) [file journal.pone.0216827.s004]

# Sampling Site Historical *E. coli* Data Analysis

**S1 Table.** Sampling site information and historical trends in single-day maximum *E. coli* exceedance across study area.

| River Tributary | Site | Historical <i>E. coli</i> $\geq 406$ MPN/100mL |                |       |          |
|-----------------|------|------------------------------------------------|----------------|-------|----------|
|                 |      | n                                              | % $\pm$ SE     | Trend | p-value  |
| Kilchis         | K1   | 230                                            | 28.3 $\pm$ 3.0 |       |          |
|                 | K2   | 227                                            | 34.4 $\pm$ 3.2 | ↓     | 0.01     |
|                 | K3   | 229                                            | 0.4 $\pm$ 0.4  |       |          |
|                 | K4   | 234                                            | 0.4 $\pm$ 0.4  |       |          |
|                 | K5   | 234                                            | 2.1 $\pm$ 0.9  |       |          |
|                 | K6   | 229                                            | 1.3 $\pm$ 0.8  |       |          |
| Trask           | TR1  | 234                                            | 12.4 $\pm$ 2.2 |       |          |
|                 | TR2  | 225                                            | 69.3 $\pm$ 3.1 | ↓     | < 0.0001 |
|                 | TR3  | 172                                            | 61.6 $\pm$ 3.7 |       |          |
|                 | TR4  | 175                                            | 58.3 $\pm$ 3.7 |       |          |
|                 | TR5  | 237                                            | 0.8 $\pm$ 0.6  |       |          |
|                 | TR6  | 237                                            | 3.4 $\pm$ 1.2  |       |          |
|                 | TR7  | 237                                            | 5.1 $\pm$ 1.4  |       |          |
|                 | TR8  | 237                                            | 59.5 $\pm$ 3.2 | ↓     | < 0.0001 |
|                 | TR9  | 237                                            | 7.2 $\pm$ 1.7  |       |          |
|                 | TR10 | 237                                            | 8.0 $\pm$ 1.8  |       |          |
|                 | TR11 | 236                                            | 77.5 $\pm$ 2.7 |       |          |
|                 | TR12 | 236                                            | 11.4 $\pm$ 2.1 |       |          |
|                 | TR13 | 237                                            | 15.2 $\pm$ 2.3 |       |          |
|                 | TR14 | 237                                            | 28.3 $\pm$ 2.9 |       |          |
| Tillamook       | TL1  | 230                                            | 37.0 $\pm$ 3.2 |       |          |
|                 | TL2  | 231                                            | 5.2 $\pm$ 1.5  |       |          |
|                 | TL3  | 231                                            | 14.3 $\pm$ 2.3 | ↓     | 0.03     |
|                 | TL4  | 231                                            | 13.0 $\pm$ 2.2 |       |          |
|                 | TL5  | 231                                            | 11.7 $\pm$ 2.1 |       |          |
|                 | TL6  | 231                                            | 27.3 $\pm$ 2.9 | ↓     | < 0.0001 |
|                 | TL7  | 231                                            | 26.4 $\pm$ 2.9 | ↓     | < 0.0001 |
|                 | TL8  | 231                                            | 16.0 $\pm$ 2.4 |       |          |
|                 | TL9  | 231                                            | 12.6 $\pm$ 2.2 |       |          |

‘n’ denotes number of samples included in analysis.

‘%  $\pm$  SE’ indicates percent exceeding 406 MPN 100/mL threshold with standard error between 2005-2015.

↓ indicates a significant decrease in %  $\pm$  SE.

Trend represents sites where there was a significant temporal trend in probability of exceedance of the 406 MPN/100mL threshold ( $p \leq 0.01$ ), after accounting for differences between wet and dry seasons.

Historical *E. coli* data from recommended sites were obtained from the Oregon Department of Environmental Quality. Sample site trends in historical *E. coli* single-day maximum exceedance probabilities (406 MPN/100mL) were based on 10 years of routine monitoring by local water quality managers summarized in Table S1. Percent exceedances ranged from consistently acceptable water quality 0.4  $\pm$  0.4% (K4, K3) to chronically poor 77.5  $\pm$  2.7% (TR11). A

significant ( $p \leq 0.01$ ) decrease in the probability of an *E. coli* single-day maximum exceedance was observed for the K2, TR2, TR8, TL3, TL6, and TL7 sites (Table S1). All remaining sites showed no significant increase or decrease ( $p > 0.01$ ) in water quality exceedances. Temporal trends in *E. coli* exceedance probabilities were calculated using a Firth's logistic regression approach.
